# Supplementary material for: Depleted uranium catalysts for chlorine production
Source: Royal Society of Chemistry journal article supplement (doi:10.1039/c3sc22067b), 2013-01-01
Supplement: c3sc22067b.pdf [file c3sc22067b.pdf]

## Electronic Supplementary Information

### Depleted uranium catalysts for chlorine production

Amol P. Amrute, Frank Krumeich, Cecilia Mondelli, and Javier Pérez-Ramírez\*

*Institute for Chemical and Bioengineering, Department of Chemistry and Applied Biosciences, ETH Zurich, Wolfgang-Pauli-Strasse 10, CH-8093 Zurich, Switzerland. E-mail: jpr@chem.ethz.ch.*

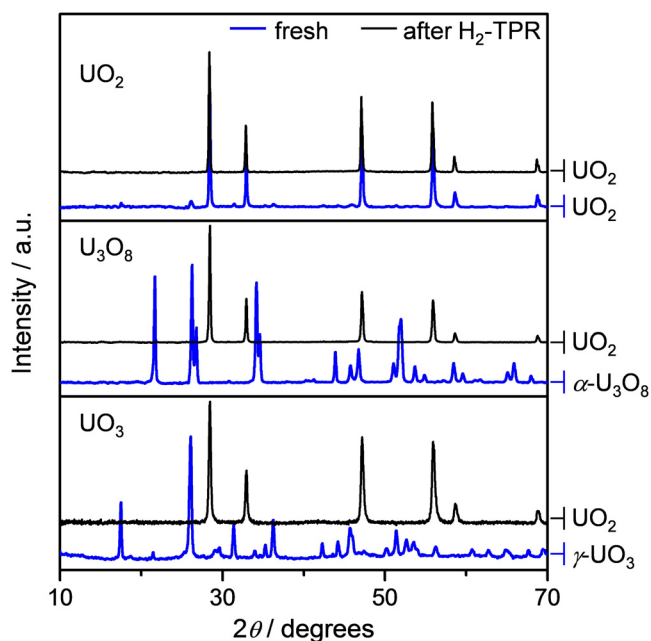

**Fig. S1** XRD patterns of the uranium oxides in fresh form (blue lines) and after H<sub>2</sub>-TPR analysis in 5 vol.% H<sub>2</sub>/N<sub>2</sub> up to 1173 K (black lines). Crystalline phases in the samples are indicated on right panel.

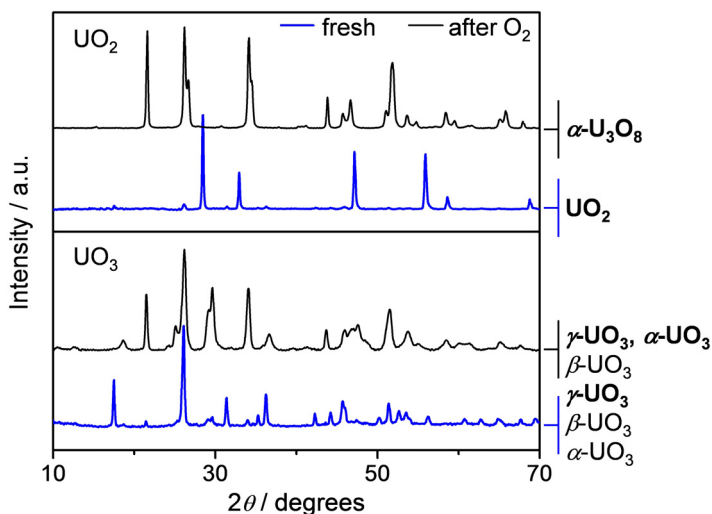

**Fig. S2** XRD patterns of the uranium oxides in fresh form (blue lines) and after treatment in 20 vol.% O<sub>2</sub>/N<sub>2</sub> at 773 K for 3 h (black lines). Crystalline phases in the samples are indicated on right panel, with the predominant phases in bold.

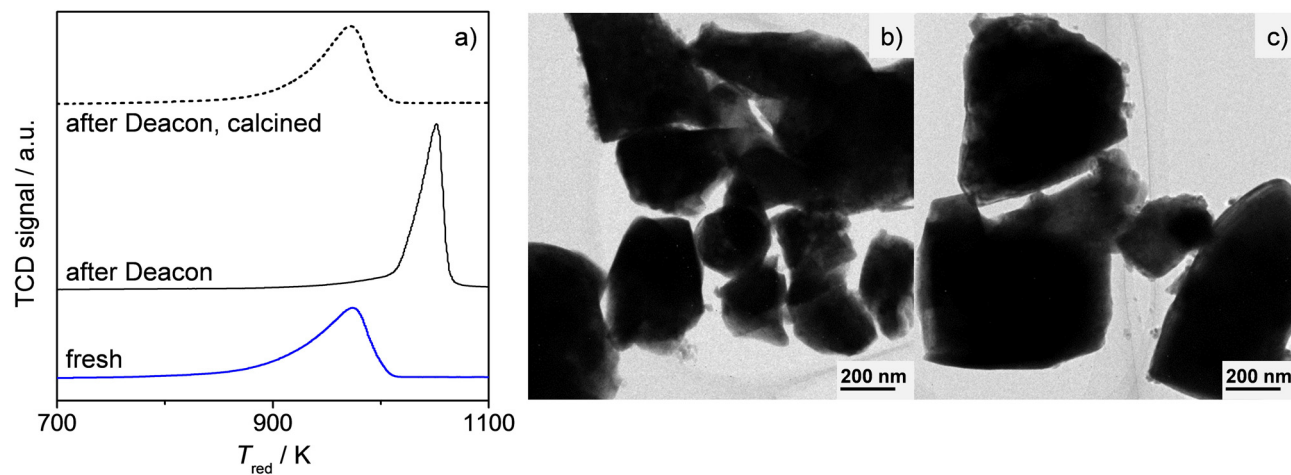

**Fig. S3** (a)  $H_2$ -TPR of  $\alpha$ - $U_3O_8$  in fresh form (blue lines), after Deacon (black lines), and used  $\alpha$ - $U_3O_8$  after calcination at 773 K in static air for 5 h (dotted lines). TEM of  $\alpha$ - $U_3O_8$  in fresh form and after Deacon.
